# Supplementary material for: Auxiliary subunits keep AMPA receptors compact during activation and desensitization
Source: eLife journal article supplement (doi:10.7554/elife.40548), 2018-12-06
Supplement: supp [file elife-40548-supp-v1.zip]

Archive with 11 entries (11 files):
- elife_poa_e40548_Figure_4_figure_supplement_1.pdf
- elife_poa_e40548_Transparent_Reporting_File.pdf
- elife_poa_e40548_Figure_2_figure_supplement_1.pdf
- elife_poa_e40548_Figure_8_figure_supplement_1.pdf
- elife_poa_e40548_Figure_2_figure_supplement_2.pdf
- elife_poa_e40548_Figure_5_figure_supplement_1.pdf
- elife_poa_e40548_Figure_2_source_data_1.docx
- elife_poa_e40548_Figure_6_source_data_1.docx
- elife_poa_e40548_Figure_6_figure_supplement_1.pdf
- elife_poa_e40548_Figure_5_source_data_1.docx
- elife_poa_e40548_Figure_2_figure_supplement_3.pdf
