# Supplementary material for: Auxiliary subunits keep AMPA receptors compact during activation and desensitization
Source: eLife journal article supplement (doi:10.7554/elife.40548), 2018-12-06

A

(1) V666C trap in CTZ and Glu + M10M

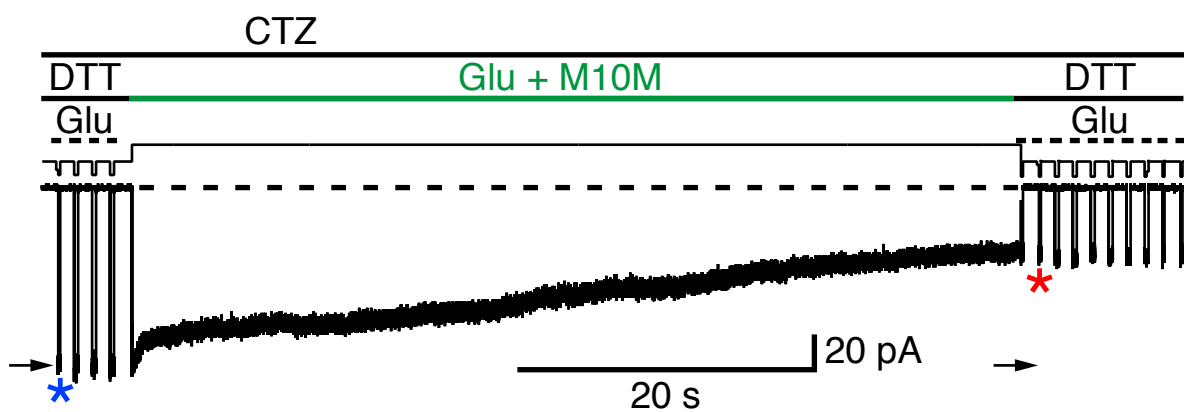

(2) CTZ unbinding

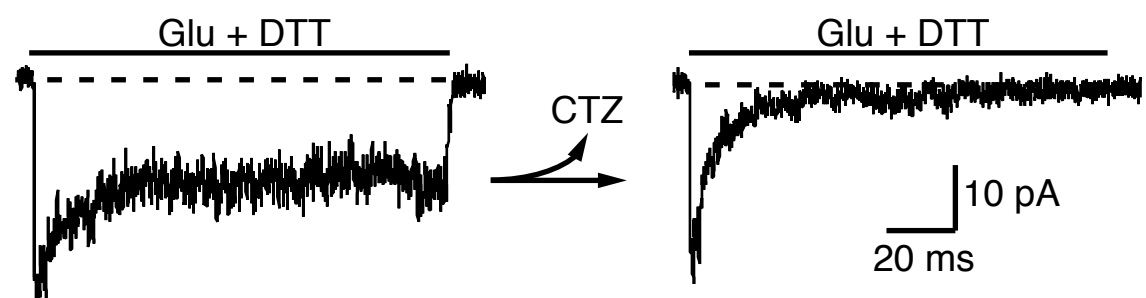

(3) V666C trap in Glu + M10M

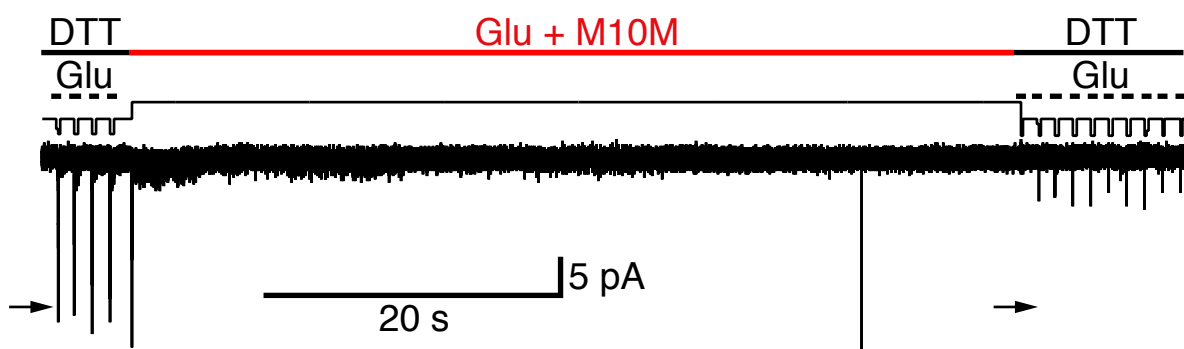

C

 $\tau_{\text{OFF}}$  before and after trap in CTZ and Glu + M10M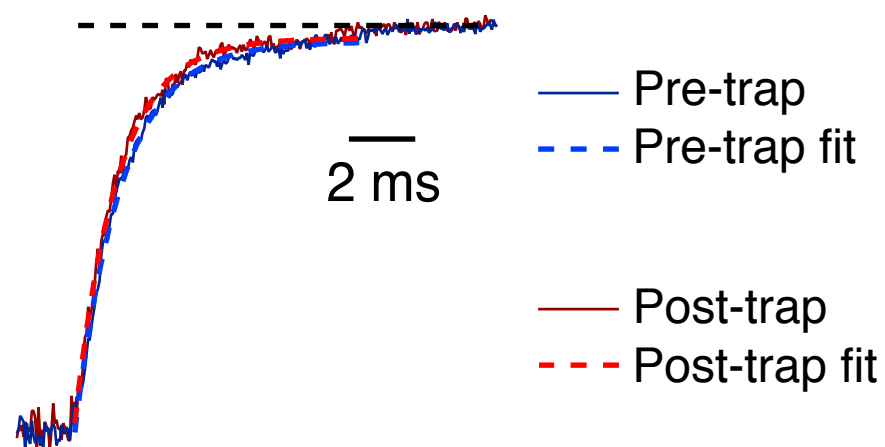

B

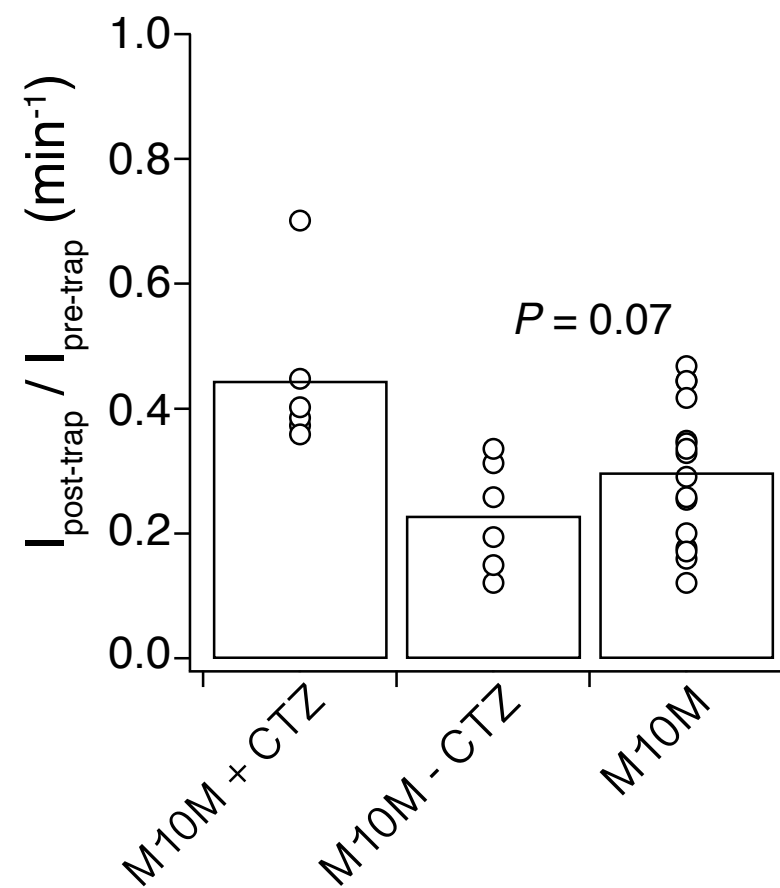

D

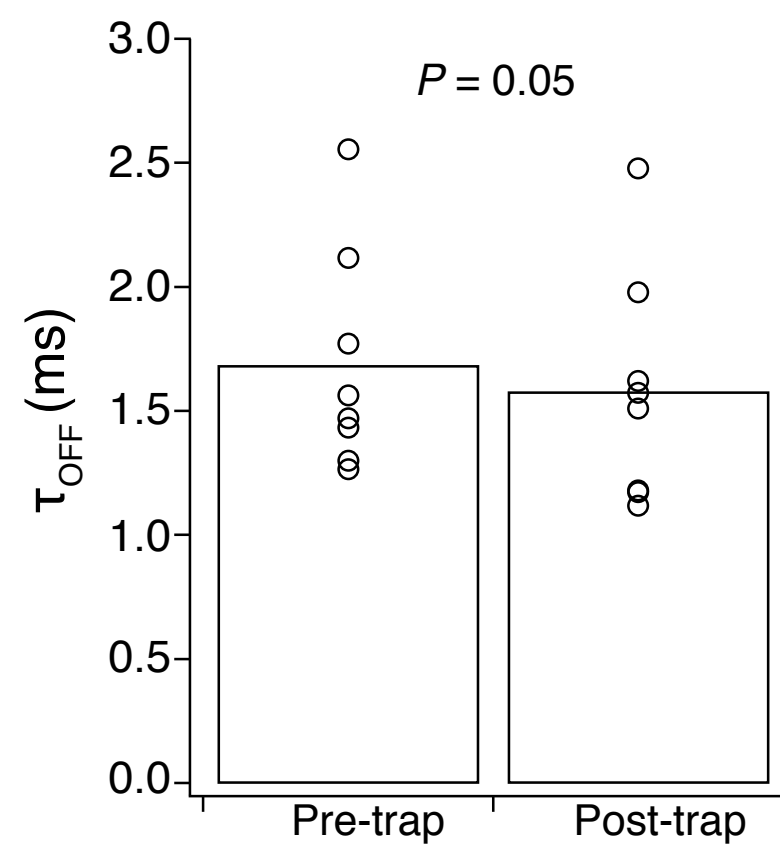

Supplement: supp [file elife-40548-supp-v1.zip › elife_poa_e40548_Figure_5_figure_supplement_1.pdf]
