# Supplementary material for: Auxiliary subunits keep AMPA receptors compact during activation and desensitization
Source: eLife journal article supplement (doi:10.7554/elife.40548), 2018-12-06
Supplement: supp [file elife-40548-supp-v1.zip › elife_poa_e40548_Figure_8_figure_supplement_1.pdf]

# LBD Dynamics

State

Native

Trapped

Active

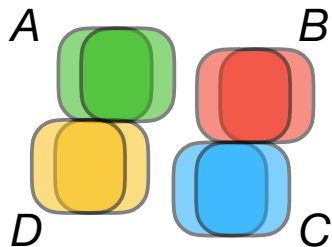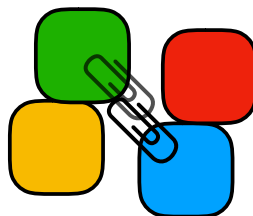

Long dimer distance  
trapped can gate  
Dimers intact

Desensitized

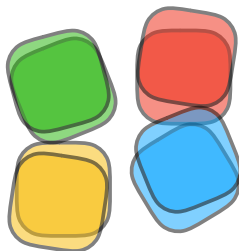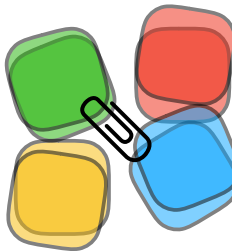

Range of dimer distances  
Trapped do not gate  
Relaxed

Active  
with Stg

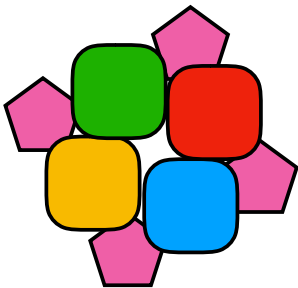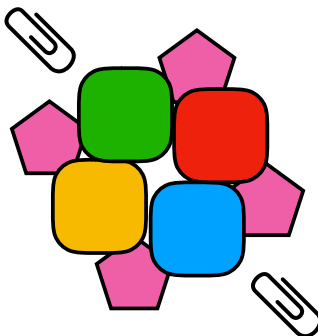

No trapping  
Compact

Desensitized  
with Stg

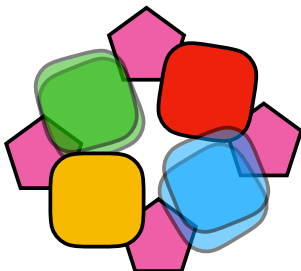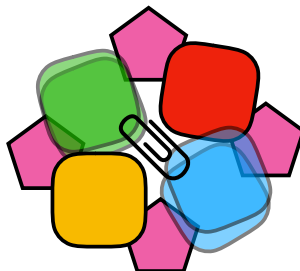

Range of dimer distances  
Trapped can gate
