# Supplementary figures and images for: Auxiliary subunits keep AMPA receptors compact during activation and desensitization
Source: eLife journal article supplement (doi:10.7554/elife.40548), 2018-12-06

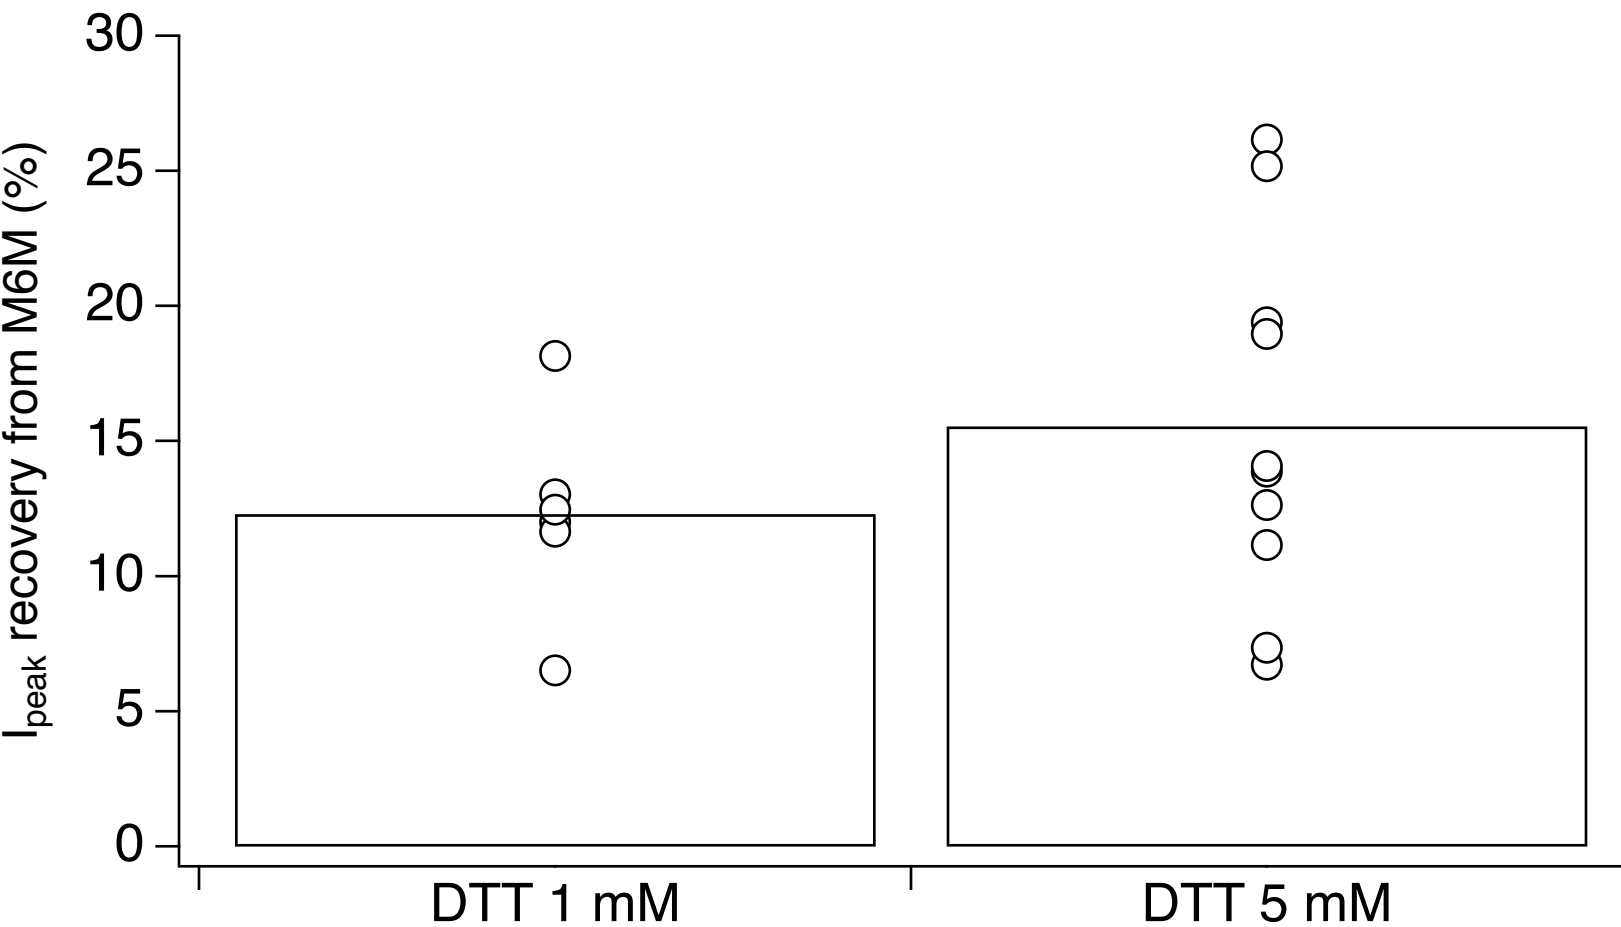

Supplement: supp [file elife-40548-supp-v1.zip › elife_poa_e40548_Figure_4_figure_supplement_1.pdf]

A

GluA2 active (4UQ6)

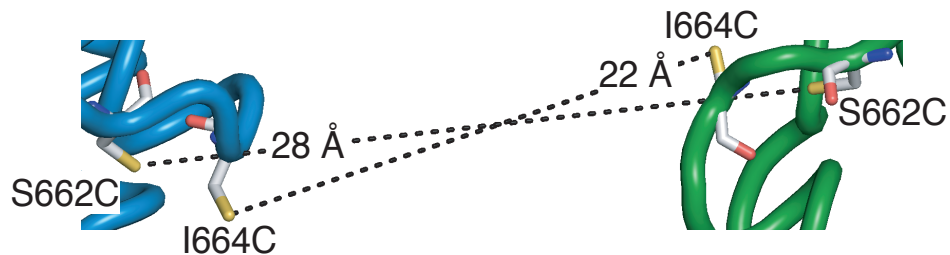

GluA2 + Stg active (5WEO)

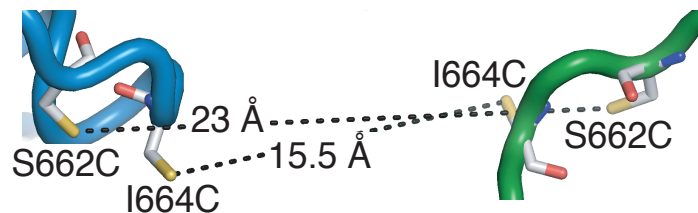

GluA2 + GSG1L desensitized (5VHZ)

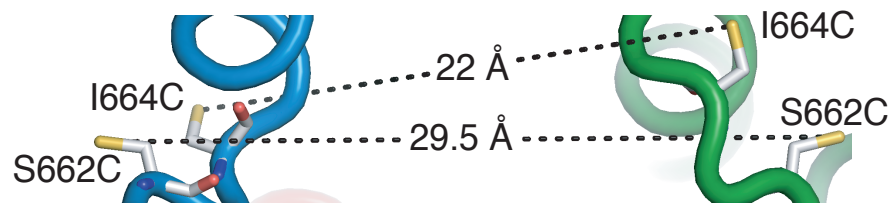

B

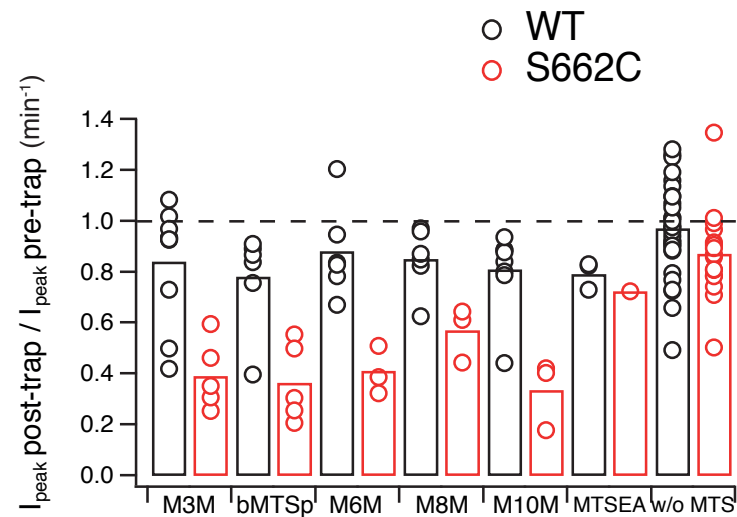

C

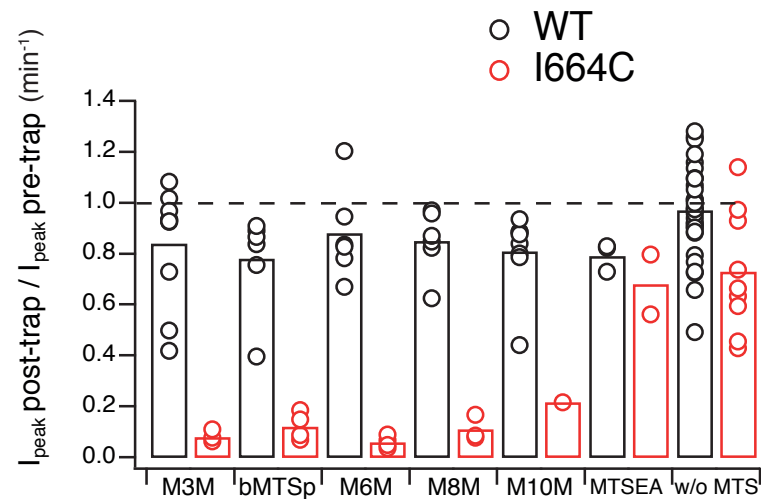

Supplement: supp [file elife-40548-supp-v1.zip › elife_poa_e40548_Figure_2_figure_supplement_1.pdf]

A

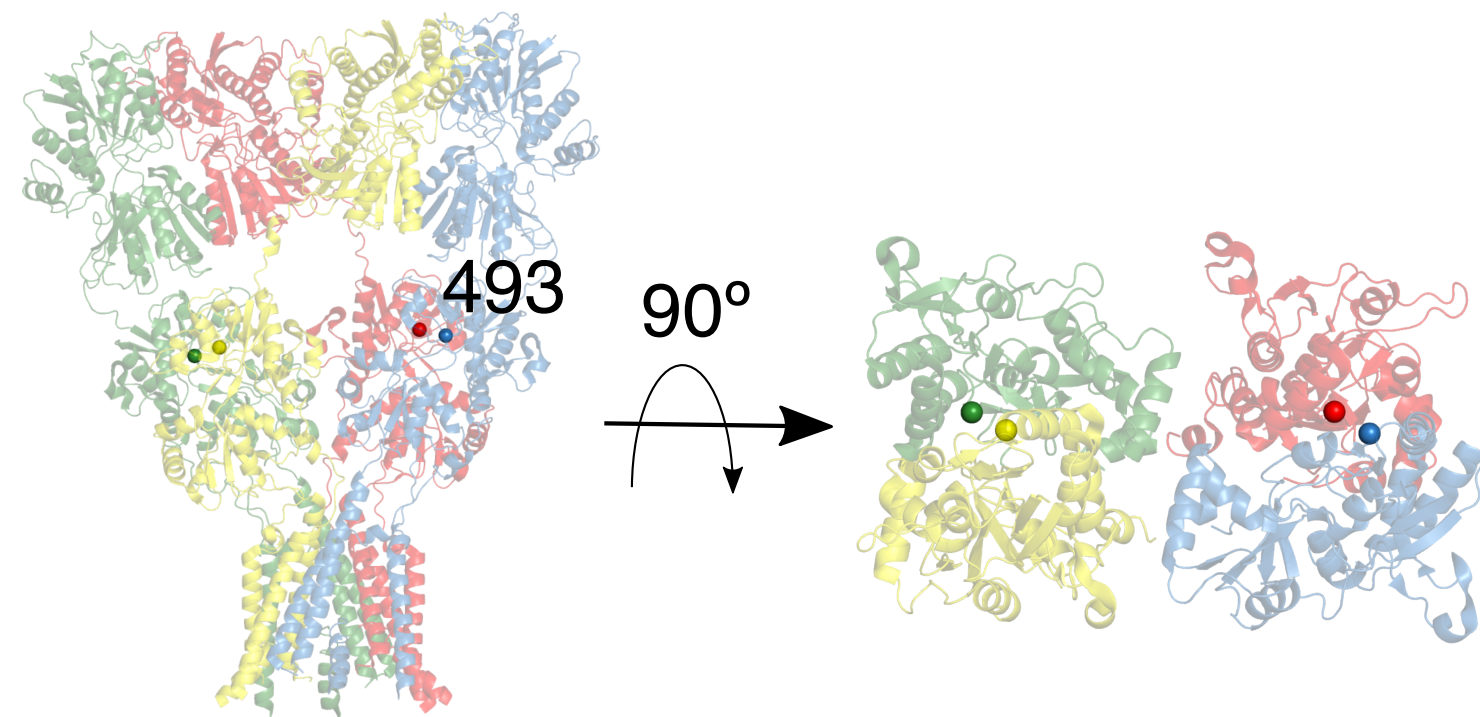

C

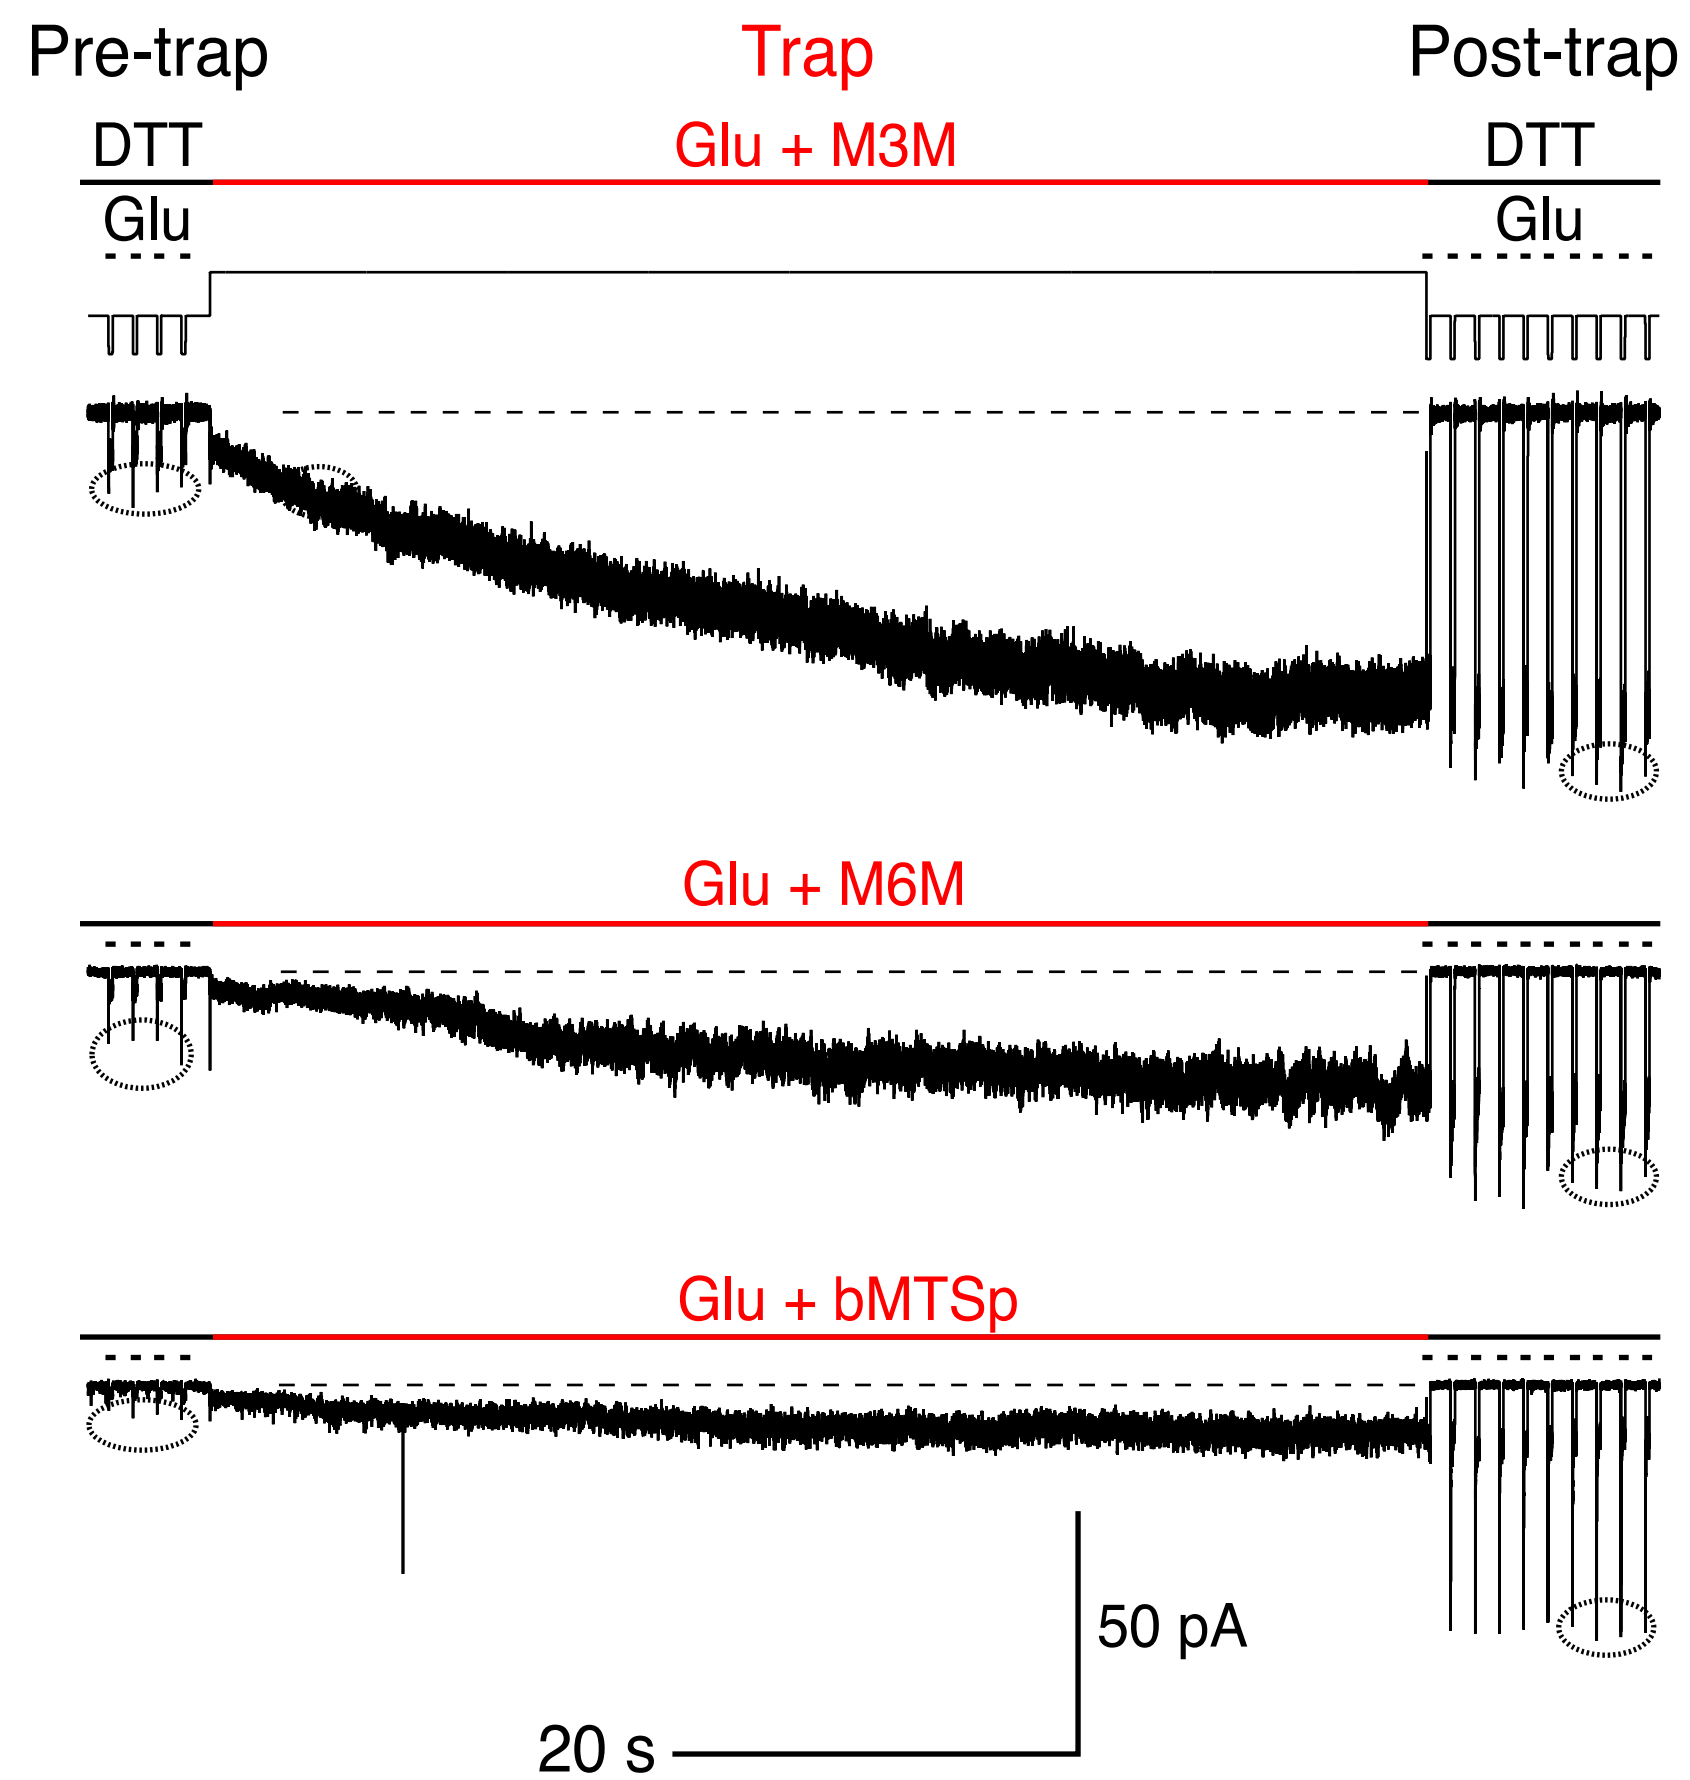

B

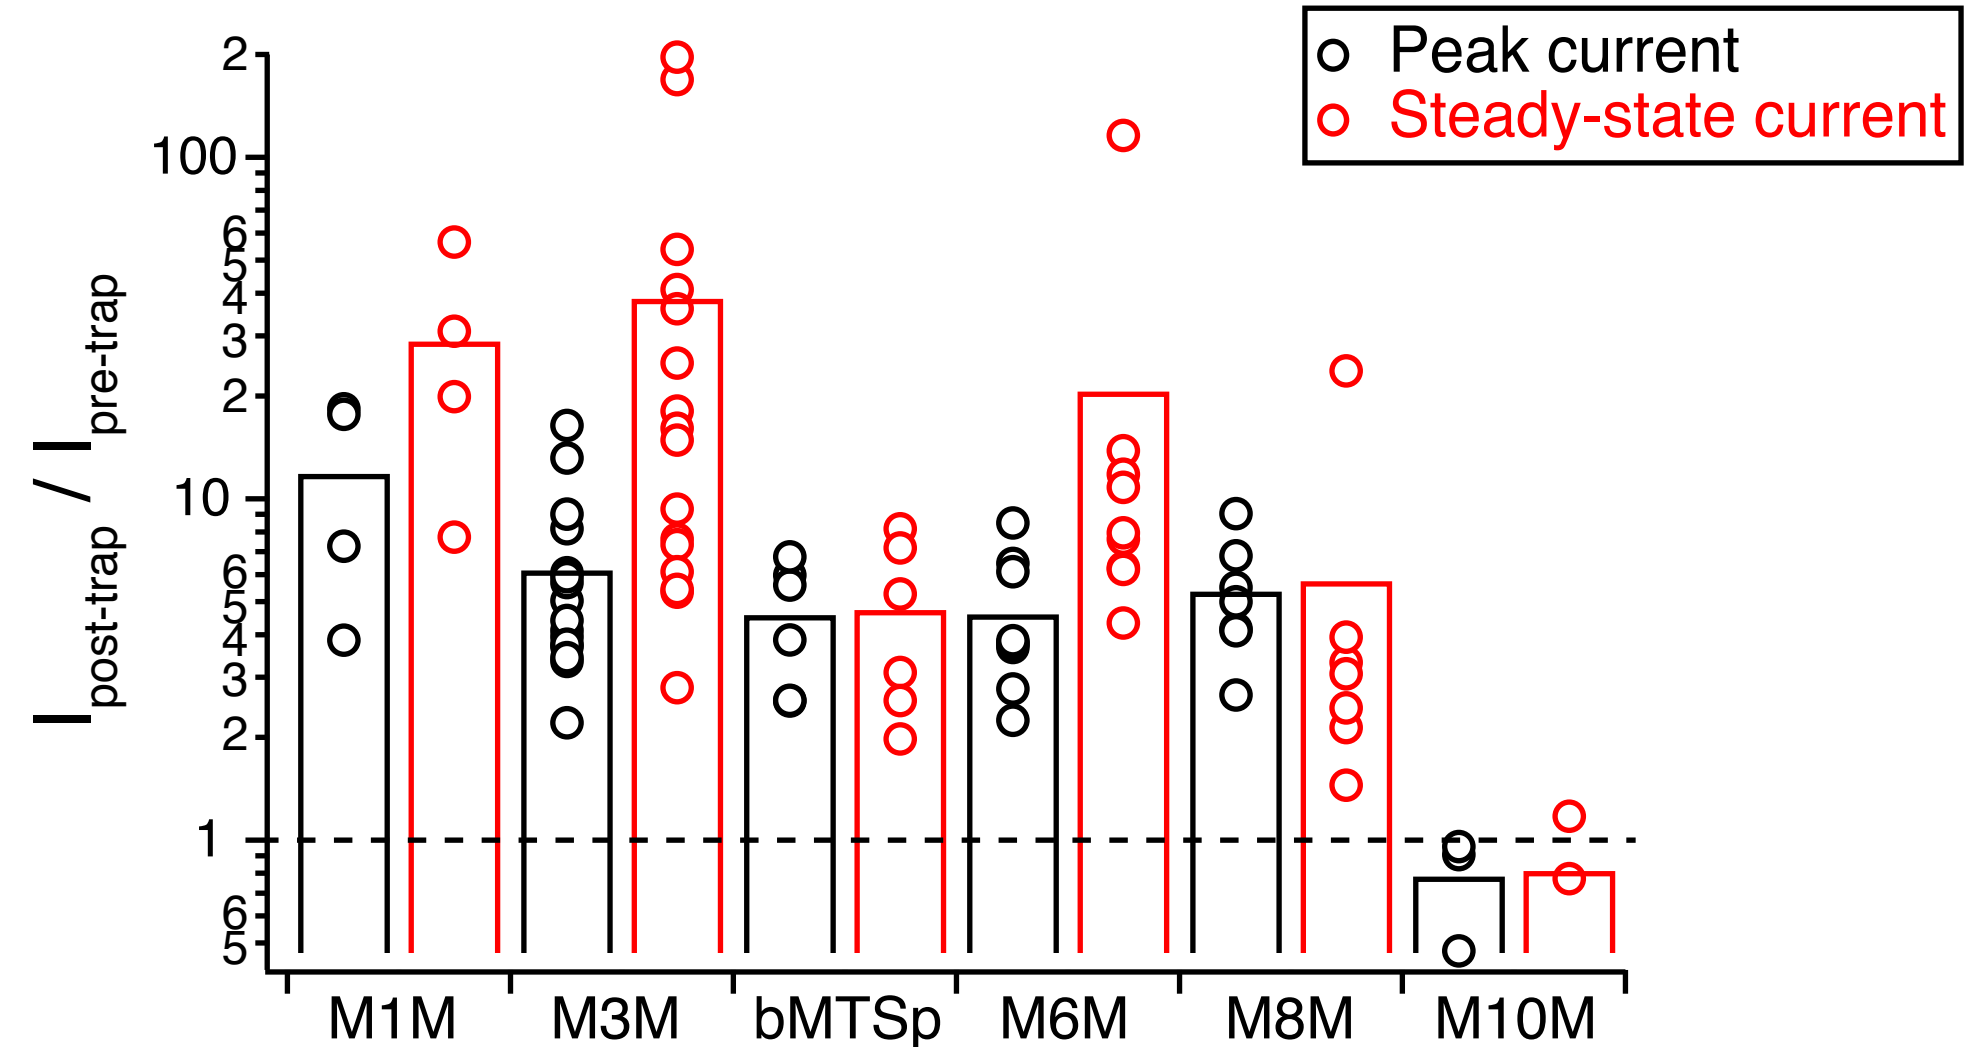

D

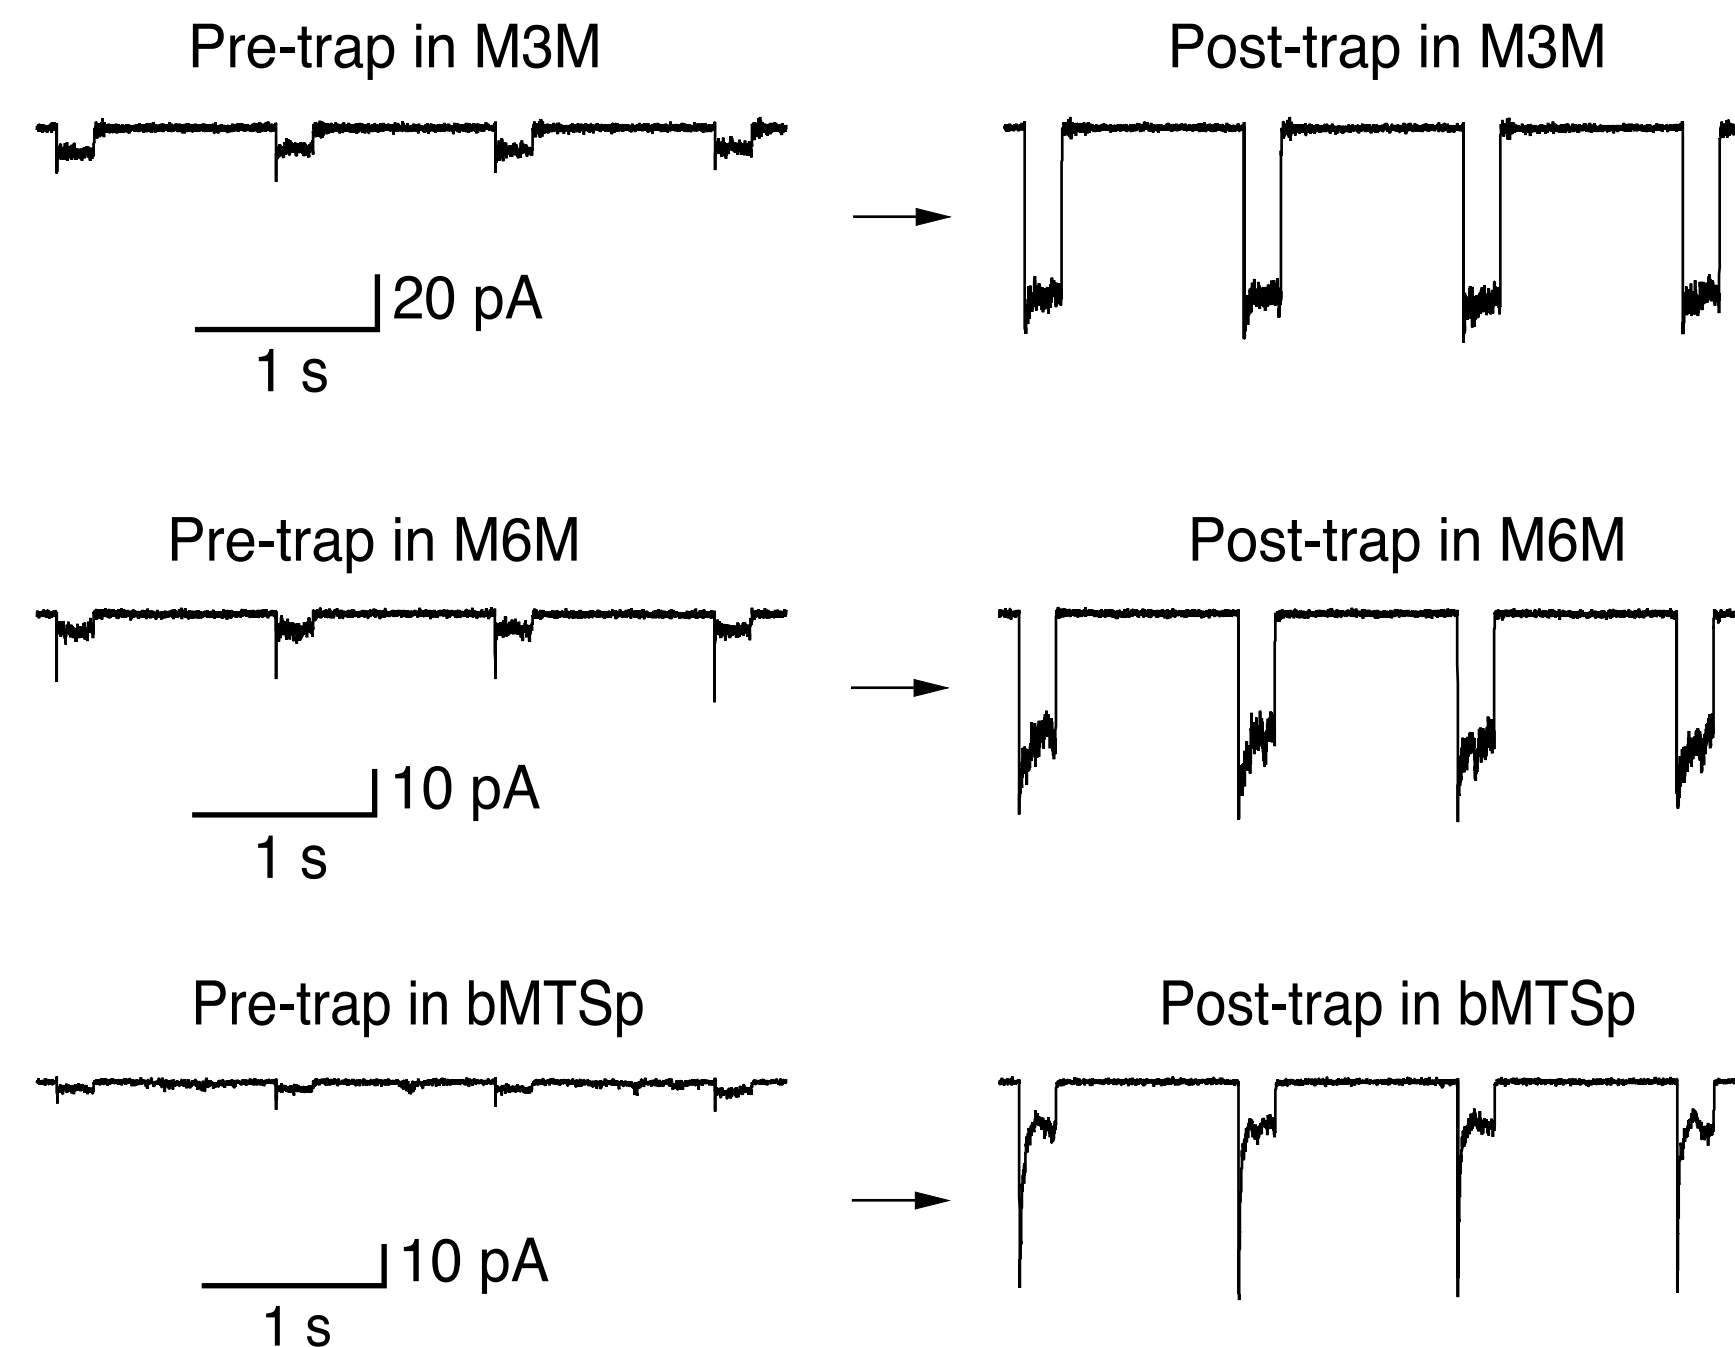

Supplement: supp [file elife-40548-supp-v1.zip › elife_poa_e40548_Figure_2_figure_supplement_2.pdf]

A

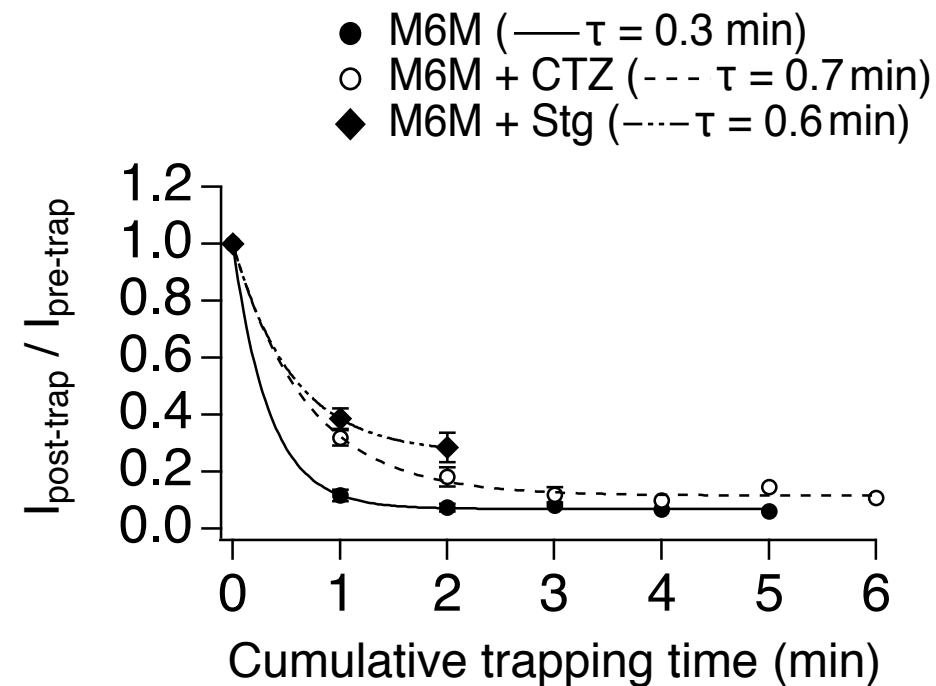

B

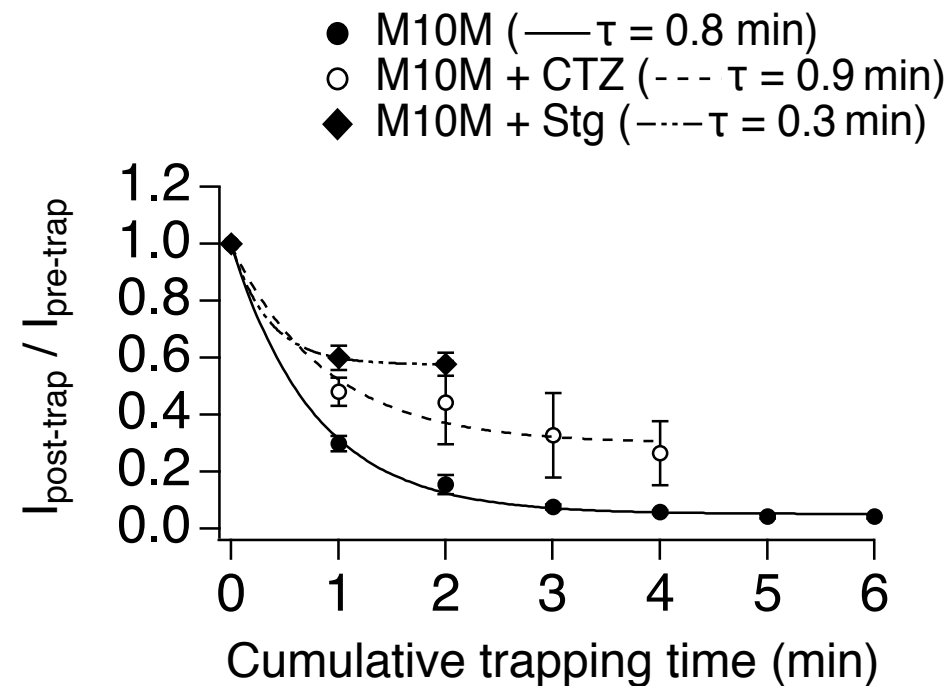

C

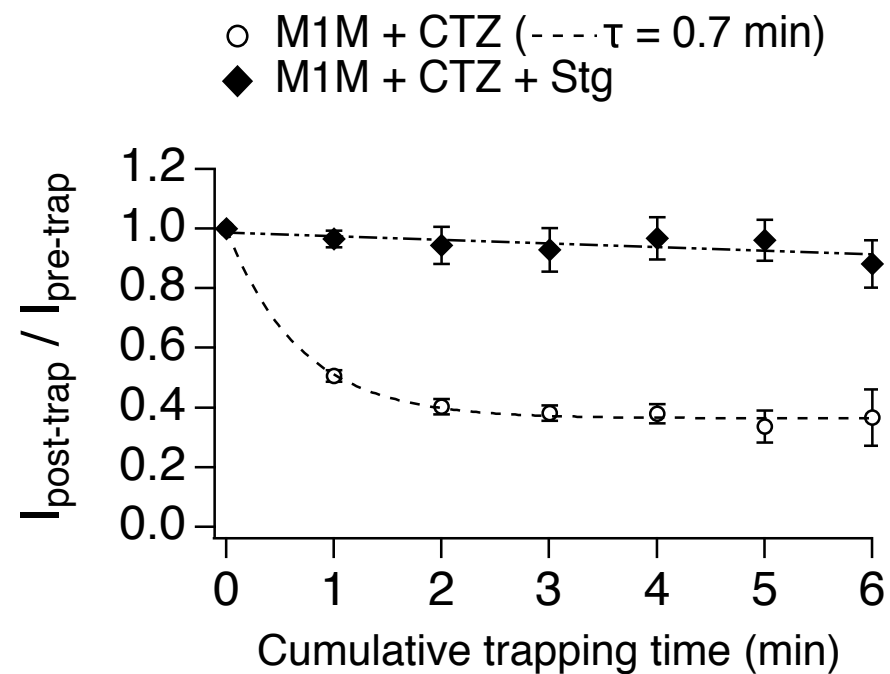

D

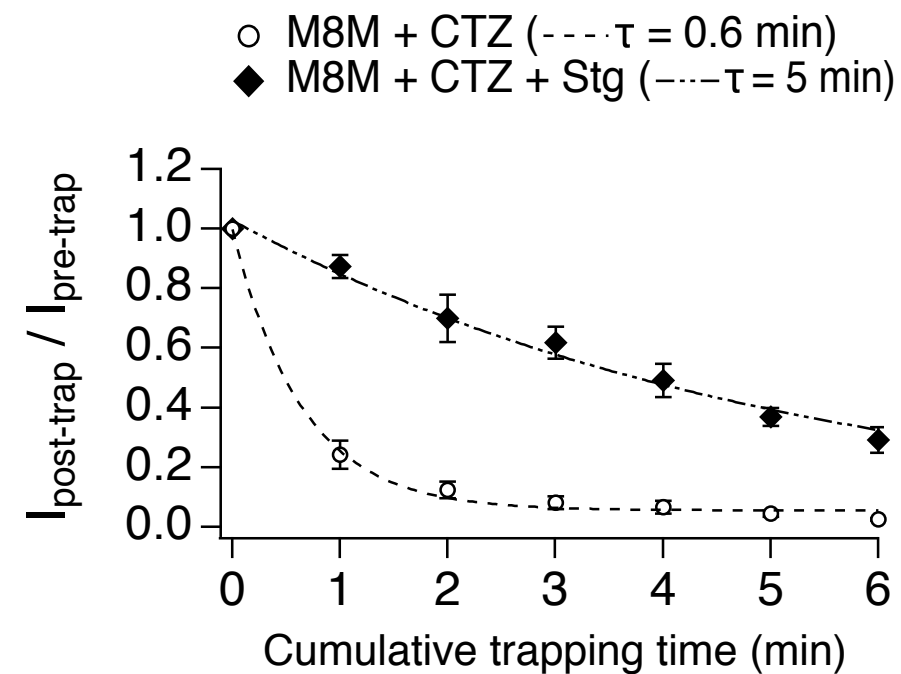

Supplement: supp [file elife-40548-supp-v1.zip › elife_poa_e40548_Figure_6_figure_supplement_1.pdf]

A

- Free WT -SH groups
- A665C -SH groups
- V666C -SH groups

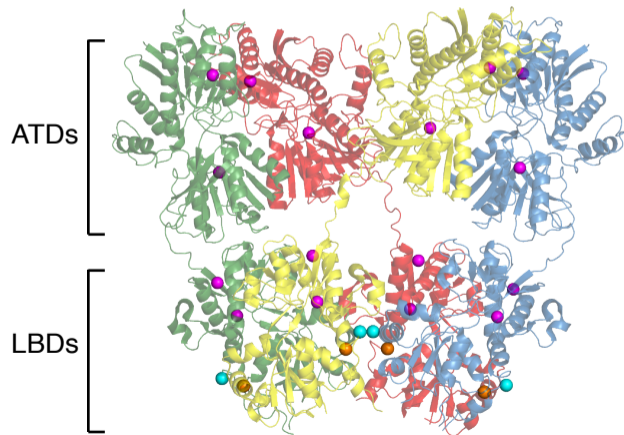

B

- M3M ( $R^2 = 9e^{-0.5}$ )
- M6M ( $R^2 = 0.008$ )
- M8M ( $R^2 = 0.08$ )
- M10M ( $R^2 = 0.1$ )

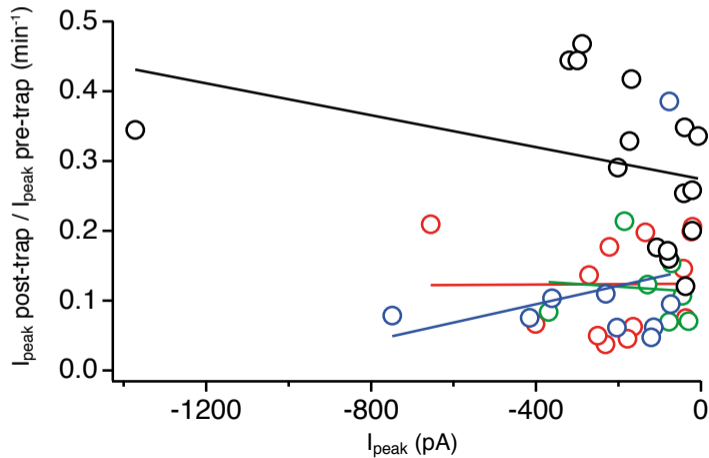

Supplement: supp [file elife-40548-supp-v1.zip › elife_poa_e40548_Figure_2_figure_supplement_3.pdf]
